# Supplementary material for: Industrialization of tailoring spherical cathode material towards high-capacity, cycling-stable and superior low temperature performance for lithium-ion batteries
Source: Royal Society of Chemistry journal article supplement (doi:10.1039/c6ra22040a), 2016-01-01
Supplement: c6ra22040a1.pdf [file c6ra22040a1.pdf]

## Supporting Information

### **Industrialization of Tailoring Spherical Cathode Material towards High-Capacity, Cycling-Stable and Superior Low Temperature Performance for Lithium-Ion Batteries**

Zhonghui Sun <sup>a</sup>, Liansheng Jiao <sup>a,c</sup>, Yingying Fan <sup>a</sup>, Fenghua Li <sup>a</sup>, Dandan Wang <sup>a</sup>,  
Dongxue Han <sup>a</sup> and Li Niu <sup>a,b\*</sup>

<sup>a</sup> State Key Laboratory of Electroanalytical Chemistry, c/o Engineering Laboratory for Modern Analytical Techniques, CAS Center for Excellence in Nanoscience, Changchun Institute of Applied Chemistry, Chinese Academy of Sciences, University of Chinese Academy of Sciences, Changchun, 130022, Beijing, 100049, P. R. China.

<sup>b</sup> School of Chemistry & Chemical Engineering, Linyi University, Linyi 276005, P. R. China.

<sup>c</sup> Department of Chemistry, Hebei Normal University for Nationalities, Chengde 067000, P. R. China.

---

\* Corresponding author, email: [lniu@ciac.ac.cn](mailto:lniu@ciac.ac.cn) (L. Niu), Fax: +86-431-526 2800.

**Table S1** Total chemical composition of as-obtained precursors by ICP analysis

|        | Measured molar ratio |       |       | Designed molar ratio |     |     |
|--------|----------------------|-------|-------|----------------------|-----|-----|
|        | Ni                   | Co    | Mn    | Ni                   | Co  | Mn  |
| NCM-3  | 0.598                | 0.198 | 0.204 | 0.6                  | 0.2 | 0.2 |
| NCM-6  | 0.599                | 0.196 | 0.205 | 0.6                  | 0.2 | 0.2 |
| NCM-12 | 0.598                | 0.199 | 0.203 | 0.6                  | 0.2 | 0.2 |

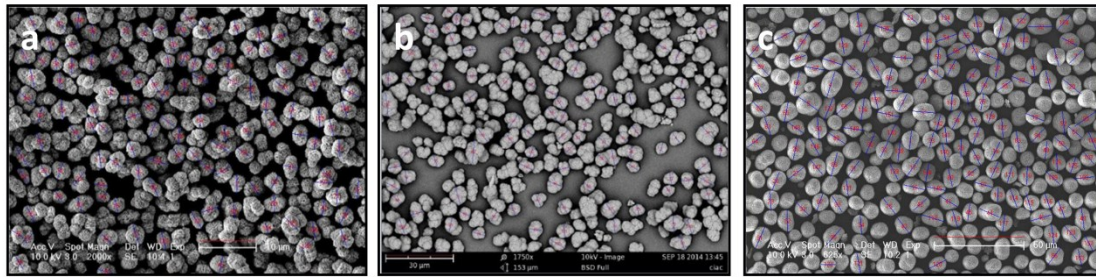

Figure S1 SEM images of the as-obtained  $\text{Li}[\text{Ni}_{0.6}\text{Co}_{0.2}\text{Mn}_{0.2}]\text{O}_2$  with different conditions were used to measure the particle size.

**Table S2** Summary of the representative  $\text{LiNi}_{0.6}\text{Co}_{0.2}\text{Mn}_{0.2}\text{O}_2$ -based cathode materials for LIBs.

| Preparation Method         | Cycling Performance                                                  | Rate Capability                                     | Ref. |
|----------------------------|----------------------------------------------------------------------|-----------------------------------------------------|------|
| Co-precipitation           | 161.4 mAh g <sup>-1</sup> after 100 cycles at 180 mA g <sup>-1</sup> | 152.7 mAh g <sup>-1</sup> at 500 mA g <sup>-1</sup> | [S1] |
| Combustion                 | 166.9 mAh g <sup>-1</sup> after 30 cycles at 20 mA g <sup>-1</sup>   | 92 mAh g <sup>-1</sup> at 320 mA g <sup>-1</sup>    | [S2] |
| Ultrasonic spray pyrolysis | 146.0 mAh g <sup>-1</sup> after 100 cycles at 170 mA g <sup>-1</sup> | 131.9 mAh g <sup>-1</sup> at 850 mA g <sup>-1</sup> | [S3] |
| Co-precipitation           | 150.4 mAh g <sup>-1</sup> after 225 cycles at 180 mA g <sup>-1</sup> | 170.0 mAh g <sup>-1</sup> at 500 mA g <sup>-1</sup> | [S4] |
| Fluorinesubstitution       | 132.8 mAh g <sup>-1</sup> after 50 cycles at 170 mA g <sup>-1</sup>  | 130.0 mAh g <sup>-1</sup> at 850 mA g <sup>-1</sup> | [S5] |
| Co-precipitation           | 169.02 mAh g <sup>-1</sup> after 100 cycles at 90 mA g <sup>-1</sup> | 166 mAh g <sup>-1</sup> at 900 mA g <sup>-1</sup>   | [S6] |
| Spray drying               | 110.8 mAh g <sup>-1</sup> after 40 cycles at 800 mA g <sup>-1</sup>  | 125 mAh g <sup>-1</sup> at 800 mA g <sup>-1</sup>   | [S7] |
| Co-precipitation           | 158.68 mAh g <sup>-1</sup> after 100 cycles at 90 mA g <sup>-1</sup> | 171 mAh g <sup>-1</sup> at 90 mA g <sup>-1</sup>    | [S8] |

|                         |                                                                         |                                                        |                     |
|-------------------------|-------------------------------------------------------------------------|--------------------------------------------------------|---------------------|
| Co-precipitation        | 122.98 mAh g <sup>-1</sup> after 100 cycles at 18 mA g <sup>-1</sup>    | 172.8 mAh g <sup>-1</sup> at 18 mA g <sup>-1</sup>     | [S9]                |
| Co-precipitation        | 151.6 mAh g <sup>-1</sup> after 50 cycles at 68 mA g <sup>-1</sup>      | 170 mAh g <sup>-1</sup> at 34 mA g <sup>-1</sup>       | [S10]               |
| <b>Co-precipitation</b> | <b>172 mAh g<sup>-1</sup> after 300 cycles at 180 mA g<sup>-1</sup></b> | <b>149 mAh g<sup>-1</sup> at 900 mA g<sup>-1</sup></b> | <b>Present work</b> |

## References

- [S1] L. W. Liang, K. Du, Z. D. Peng, Y. B. Cao, J. G. Duan, J. B. Jiang, G. R. Hu, *Electrochimica Acta*, 2014, 130, 82-89.
- [S2] W. Ahn, S. N. Lim, K. N. Jung, S. H. Yeon, K. B. Kim, H. S. Song, K. H. Shin, *Journal of Alloys Compound*, 2014, 609,143-149.
- [S3] T. Li, X. H. Li, Z. X. Wang, H. J. Guo, W. J. Peng, K. W. Zeng, *Materials Letters*, 2015, 159, 39-42.
- [S4] P. Y. Hou, L. Q. Zhang, X. P. Gao, *Journal of Material Chemistry A*, 2014, 2, 17130-17138.
- [S5] P. Yue, Z. X. Wang, X. H. Li, X. H. Xiong, J. X. Wang, X. W. Wu, H. J. Guo, *Electrochimica Acta*, 2013, 112-118.
- [S6] S. H. Ju, I. S. Kang, Y. S. Lee, W. K. Shin, S. Kim, K. Shin, D. W. Kim, *ACS Applied Material Interfaces*, 2014, 6, 2546-2552.
- [S7] P. Yue, Z. X. Wang, W. J. Peng, L. J. Li, H. J. Guo, X. H. Li, Q. Y. Hu, Y. H. Zhang, *Scripta Materialia*, 2011, 65, 1077-1080.
- [S8] Y. S. Lee, W. K. Shin, A. G. Kannan, S. M. Koo, D. W. Kim, *ACS Applied Material Interfaces*, 2015,7, 13944-13951.
- [S9] J. G. Li, L. Wang, Q. Zhang, X. M. He, *Journal of Power Sources*, 2009, 189, 28-33.
- [S10] H. Cao, Y. Zhang, J. Zhang, B. J. Xia, *Solid State Ionics*, 2005, 176, 1207-1211.
